# Supplementary material for: Comparing Gut Microbiome in Mothers’ Own Breast Milk- and Formula-Fed Moderate-Late Preterm Infants
Source: PubMed Central journal article supplement (PMC7264382; doi:10.3389/fmicb.2020.00891), 2020-05-26
Supplement: Data_Sheet_1.pdf [file Data_Sheet_1.pdf]

## Supplementary:

**Supplementary Table S1. Population demographics**

|                         | Breast milk | Formula    | p value |
|-------------------------|-------------|------------|---------|
| Gestational age(weeks)  | 33.7 ± 1.26 | 34 ± 1.5   | 0.6546  |
| Birth weight(grams)     | 2114 ± 415  | 2202 ± 494 | 0.6702  |
| First sample age(days)  | 15 ± 6.4    | 15 ± 14.3  | 0.4114  |
| Second sample age(days) | 17 ± 5.9    | 17 ± 14.9  | 0.9951  |
| Antibiotic exposure     | 60%         | 50%        |         |
| Vaginal delivery        | 30%         | 30%        |         |
| Gender(male)            | 30%         | 60%        |         |
| Twins                   | 40%         | 60%        |         |
| Proton Pump Inhibitor   | 0%          | 0%         |         |

**Supplementary Table S2. Alpha diversities in different nutrition.**

| Index         |         |   |             | p-value |
|---------------|---------|---|-------------|---------|
| berger_parker | Fomular | ~ | Breast milk | 0.48    |
| buzas_gibson  | Fomular | ~ | Breast milk | 0.684   |
| chao1         | Fomular | ~ | Breast milk | 0.794   |
| dominance     | Fomular | < | Breast milk | 0.142   |
| equitability  | Fomular | < | Breast milk | 0.123   |
| jost          | Fomular | < | Breast milk | 0.124   |
| jost1         | Fomular | < | Breast milk | 0.141   |
| reads         | Fomular | < | Breast milk | 0.142   |
| richness      | Fomular | ~ | Breast milk | 0.483   |
| richness2     | Fomular | ~ | Breast milk | 0.315   |
| robbins       | Fomular | < | Breast milk | 0.164   |
| simpson       | Fomular | > | Breast milk | 0.142   |
| shannon_e     | Fomular | < | Breast milk | 0.142   |
| shannon_2     | Fomular | < | Breast milk | 0.143   |
| shannon_10    | Fomular | < | Breast milk | 0.143   |
| flyvbjerg     | Fomular | ~ | Breast milk | 0.529   |
| mirror        | Fomular | < | Breast milk | 0.19    |
| mirrnors      | Fomular | ~ | Breast milk | 0.852   |
| logfit        | Fomular | > | Breast milk | 0.137   |
| logfitns      | Fomular | ~ | Breast milk | 0.222   |
| logfitmu      | Fomular | > | Breast milk | 0.192   |
| logfitmuns    | Fomular | ~ | Breast milk | 0.337   |

“~” and “=” = metric is approximately equal in both groups

“>” and “<” = metric has weak significance ( $P < 0.2$ )

“>>” = metric has high significant ( $P < 0.05$ )

**Supplementary Table S3. Top 10 informative OTUs identified by random forest classifier<sup>[116]</sup> that can be used to distinguish MBM from formula-fed infants.**

| OTU number | Importance * | Frequency category** | Taxonomy predictions                                                                                              |
|------------|--------------|----------------------|-------------------------------------------------------------------------------------------------------------------|
| Otu19      | 0.0137       | Breast milk          | d:Bacteria,p:Actinobacteria,c:Actinobacteria,o:Actinomycetales,f:Propionibacteriaceae,g:Propionibacterium         |
| Otu34      | 0.0095       | Formula              | d:Archaea,p:Thaumarchaeota,o:Nitrososphaerales,f:Nitrososphaeraceae,g:Nitrososphaera                              |
| Otu282     | 0.00933      | Formula              | d:Others                                                                                                          |
| Otu4       | 0.00887      | Breast milk          | d:Bacteria,p:Firmicutes,c:Bacilli,o:Bacillales,f:Staphylococcaceae,g:Staphylococcus                               |
| Otu26      | 0.00785      | Formula              | d:Bacteria,p:Actinobacteria,c:Actinobacteria,o:Actinomycetales,f:Micrococcaceae,g:Rothia                          |
| Otu77      | 0.00636      | Formula              | d:Archaea,p:Thaumarchaeota,o:Nitrososphaerales,f:Nitrososphaeraceae,g:Nitrososphaera                              |
| Otu329     | 0.00573      | Formula              | d:Bacteria,p:Actinobacteria,c:Actinobacteria                                                                      |
| Otu69      | 0.00549      | Formula              | d:Bacteria,p:Acidobacteria,c:Acidobacteria_Gp4                                                                    |
| Otu3       | 0.00517      | Breast milk          | d:Bacteria,p:Proteobacteria,c:Gammaproteobacteria,o:Enterobacteriales,f:Enterobacteriaceae,g:Escherichia/Shigella |
| Otu37      | 0.00507      | Breast milk          | d:Bacteria,p:Firmicutes,c:Bacilli,o:Lactobacillales,f:Streptococcaceae,g:Streptococcus                            |

\* The "Importance" value of a less than 0.05 indicates the significance of the particular otu in distinguishing between the two groups.

\*\* Frequency category indicates the group showing the frequency of a particular otu.

**Supplementary Table S4. The top 30 frequency distance rank of OTUs in nutrition.**

| Rank | Min Gini | Max AUC | AUC*  | ScoreA   | ScoreG   | Med      | Breast milk** | OTU Name | Taxa Name                                   |
|------|----------|---------|-------|----------|----------|----------|---------------|----------|---------------------------------------------|
| 1    | 0.2308   | 0.85    | 0.835 | 4        | 4        | 0        | +             | Otu19    | <b>g:Propionibacterium</b>                  |
| 2    | 0.32     | 0.8     | 0.76  | 0.5      | 0.5      | 1        | -             | Otu130   | <b>c:Acidobacteria_Gp6</b>                  |
| 3    | 0.3333   | 0.75    | 0.75  | 0.5      | 0.5      | 0        | -             | Otu282   | <b>g:Oceanobacillus</b>                     |
| 4    | 0.3333   | 0.75    | 0.675 | 2.30E+02 | 2.30E+02 | 0        | +             | Otu3     | <b>g:Escherichia/Shigella</b>               |
| 5    | 0.3333   | 0.75    | 0.75  | 1        | 1        | 0        | +             | Otu63    | <b>g:Veillonella</b>                        |
| 6    | 0.3333   | 0.75    | 0.75  | 0.5      | 0.5      | 0        | -             | Otu571   | <b>g:Subdivision3_genera_incertae_sedis</b> |
| 7    | 0.3333   | 0.75    | 0.75  | 0.5      | 0.5      | 0        | -             | Otu49    | <b>g:Enterococcus</b>                       |
| 8    | 0.3333   | 0.75    | 0.775 | 1.5      | 1.5      | 0        | -             | Otu117   | <b>g:Terrimonas</b>                         |
| 9    | 0.3626   | 0.75    | 0.61  | 2.50E+02 | 2.50E+02 | 4.60E+02 | +             | Otu4     | <b>g:Staphylococcus</b>                     |
| 10   | 0.3626   | 0.75    | 0.74  | 1.5      | 1.5      | 0        | -             | Otu26    | <b>g:Rothia</b>                             |
| 11   | 0.3737   | 0.75    | 0.75  | 0.5      | 0.5      | 0        | -             | Otu150   | <b>o:Actinomycetales</b>                    |
| 12   | 0.375    | 0.7     | 0.7   | 4.5      | 4.5      | 0        | -             | Otu689   | <b>g:Enterococcus</b>                       |
| 13   | 0.375    | 0.7     | 0.72  | 1.5      | 1.5      | 0        | -             | Otu77    | <b>g:Nitrososphaera</b>                     |
| 14   | 0.375    | 0.7     | 0.7   | 0.5      | 0.5      | 0        | -             | Otu366   | <b>g:Hyphomicrobium</b>                     |
| 15   | 0.375    | 0.7     | 0.7   | 0.5      | 0.5      | 0        | -             | Otu329   | <b>c:Actinobacteria</b>                     |
| 16   | 0.375    | 0.7     | 0.7   | 0.5      | 0.5      | 0        | -             | Otu167   | <b>o:Rhizobiales</b>                        |
| 17   | 0.375    | 0.7     | 0.7   | 0.5      | 0.5      | 0        | -             | Otu248   | <b>g:Gp4</b>                                |
| 18   | 0.375    | 0.7     | 0.7   | 0.5      | 0.5      | 0        | +             | Otu1010  | <b>g:Propionibacterium</b>                  |
| 19   | 0.4048   | 0.7     | 0.675 | 0.5      | 0.5      | 0        | -             | Otu250   | <b>g:Gp6</b>                                |
| 20   | 0.4048   | 0.7     | 0.65  | 1.5      | 1.5      | 0        | -             | Otu90    | <b>f:Geodermatophilaceae</b>                |
| 21   | 0.4048   | 0.7     | 0.695 | 6.5      | 5.5      | 5        | -             | Otu34    | <b>g:Nitrososphaera</b>                     |
| 22   | 0.4048   | 0.7     | 0.675 | 0.5      | 0.5      | 0        | +             | Otu14    | <b>g:Finegoldia</b>                         |
| 23   | 0.4118   | 0.65    | 0.65  | 0.5      | 0.5      | 0        | -             | Otu825   | <b>g:Streptomyces</b>                       |
| 24   | 0.4118   | 0.65    | 0.65  | 0.5      | 0.5      | 0        | -             | Otu238   | <b>d:Bacteria</b>                           |
| 25   | 0.4118   | 0.65    | 0.65  | 0.5      | 0.5      | 0        | -             | Otu281   | <b>c:Actinobacteria</b>                     |
| 26   | 0.4118   | 0.65    | 0.65  | 0.5      | 0.5      | 0        | -             | Otu359   | <b>o:Actinomycetales</b>                    |
| 27   | 0.4118   | 0.65    | 0.65  | 0.5      | 0.5      | 0        | -             | Otu392   | <b>c:Betaproteobacteria</b>                 |
| 28   | 0.4118   | 0.65    | 0.65  | 0.5      | 0.5      | 0        | -             | Otu259   | <b>g:Gp6</b>                                |
| 29   | 0.4118   | 0.65    | 0.65  | 0.5      | 0.5      | 0        | -             | Otu10    | <b>g:Akkermansia</b>                        |
| 30   | 0.4118   | 0.65    | 0.65  | 0.5      | 0.5      | 0        | -             | Otu23    | <b>g:Dermabacter</b>                        |

\* AUC = Area under the ROC curve

\*\* (+) or (-) indicates whether high or low abundance implies the positive category.

**Supplementary Table S5. List of Gene Ontology Categories of two diet groups.** Interpro2GO results of nine MBM infants and seven formula fed infants are showed. It is listed by decrease order.

| MBM group                                                   | Formula fed group                                           |
|-------------------------------------------------------------|-------------------------------------------------------------|
| GO:0003824 catalytic activity                               | GO:0003824 catalytic activity                               |
| GO:0008152 metabolic process                                | GO:0008152 metabolic process                                |
| GO:0003676 nucleic acid binding                             | Other                                                       |
| GO:0043167 ion binding                                      | GO:0031224 intrinsic component of membrane                  |
| Unclassified                                                | GO:0006810 transport                                        |
| GO:0006810 transport                                        | Unclassified                                                |
| GO:0006259 DNA metabolic process                            | GO:0071840 cellular component organization or biogenesis    |
| GO:0031224 intrinsic component of membrane                  | GO:0016070 RNA metabolic process                            |
| Other                                                       | GO:0003676 nucleic acid binding                             |
| GO:0006950 response to stress                               | GO:0000166 nucleotide binding                               |
| GO:0000166 nucleotide binding                               | GO:0043167 ion binding                                      |
| GO:0071840 cellular component organization or biogenesis    | GO:0005215 transporter activity                             |
| GO:0016070 RNA metabolic process                            | GO:0006259 DNA metabolic process                            |
| GO:0005215 transporter activity                             | GO:0003735 structural constituent of ribosome               |
| GO:0005622 intracellular                                    | GO:0005515 protein binding                                  |
| GO:0016020 membrane                                         | GO:0006950 response to stress                               |
| GO:0003735 structural constituent of ribosome               | GO:0006457 protein folding                                  |
| GO:0005840 ribosome                                         | GO:0016020 membrane                                         |
| GO:0005737 cytoplasm                                        | GO:0005737 cytoplasm                                        |
| GO:0098796 membrane protein complex                         | GO:0046906 tetrapyrrole binding                             |
| GO:1902494 catalytic complex                                | GO:0005622 intracellular                                    |
| GO:0019222 regulation of metabolic process                  | GO:0005840 ribosome                                         |
| GO:0050662 coenzyme binding                                 | GO:0050662 coenzyme binding                                 |
| GO:0005515 protein binding                                  | GO:1902494 catalytic complex                                |
| GO:0030170 pyridoxal phosphate binding                      | GO:0098796 membrane protein complex                         |
| GO:0006457 protein folding                                  | GO:0019222 regulation of metabolic process                  |
| GO:0003700 DNA-binding transcription factor activity        | GO:0007165 signal transduction                              |
| GO:0042221 response to chemical                             | GO:0030170 pyridoxal phosphate binding                      |
| GO:0046906 tetrapyrrole binding                             | GO:0003700 DNA-binding transcription factor activity        |
| GO:0051536 iron-sulfur cluster binding                      | GO:0019842 vitamin binding                                  |
| GO:0016209 antioxidant activity                             | GO:0016032 viral process                                    |
| GO:0019842 vitamin binding                                  | GO:0009628 response to abiotic stimulus                     |
| GO:0009628 response to abiotic stimulus                     | GO:0016209 antioxidant activity                             |
| GO:0004601 peroxidase activity                              | GO:0042221 response to chemical                             |
| GO:0045454 cell redox homeostasis                           | GO:0045454 cell redox homeostasis                           |
| GO:0016226 iron-sulfur cluster assembly                     | GO:0004601 peroxidase activity                              |
| GO:0042597 periplasmic space                                | GO:0016226 iron-sulfur cluster assembly                     |
| GO:0005694 chromosome                                       | GO:0051536 iron-sulfur cluster binding                      |
| GO:0007165 signal transduction                              | GO:0005694 chromosome                                       |
| GO:0005618 cell wall                                        | GO:0042597 periplasmic space                                |
| GO:0048500 signal recognition particle                      | GO:0038023 signaling receptor activity                      |
| GO:0009288 bacterial-type flagellum                         | GO:0071973 bacterial-type flagellum-dependent cell motility |
| GO:0009372 quorum sensing                                   | GO:0048500 signal recognition particle                      |
| GO:0043934 sporulation                                      | GO:0009372 quorum sensing                                   |
| GO:0071973 bacterial-type flagellum-dependent cell motility | GO:0009405 pathogenesis                                     |
| GO:0030246 carbohydrate binding                             | GO:0009346 citrate lyase complex                            |
| GO:0038023 signaling receptor activity                      | GO:0005576 extracellular region                             |
| GO:0009405 pathogenesis                                     | GO:0043934 sporulation                                      |
| GO:0005839 proteasome core complex                          | GO:0005634 nucleus                                          |
| GO:0005576 extracellular region                             | GO:0009607 response to biotic stimulus                      |
| GO:0009579 thylakoid                                        | GO:0030246 carbohydrate binding                             |
| GO:0009346 citrate lyase complex                            | GO:0005727 extrachromosomal circular DNA                    |
| GO:0007155 cell adhesion                                    | GO:0005618 cell wall                                        |
| GO:0006808 regulation of nitrogen utilization               | GO:0005839 proteasome core complex                          |
| GO:0005727 extrachromosomal circular DNA                    | GO:0009288 bacterial-type flagellum                         |
| GO:0016032 viral process                                    | GO:0007155 cell adhesion                                    |
| GO:0005634 nucleus                                          | GO:0009579 thylakoid                                        |
| GO:0009607 response to biotic stimulus                      | GO:0006808 regulation of nitrogen utilization               |
| GO:0005874 microtubule                                      | GO:0005874 microtubule                                      |
|                                                             | GO:0019012 virion                                           |

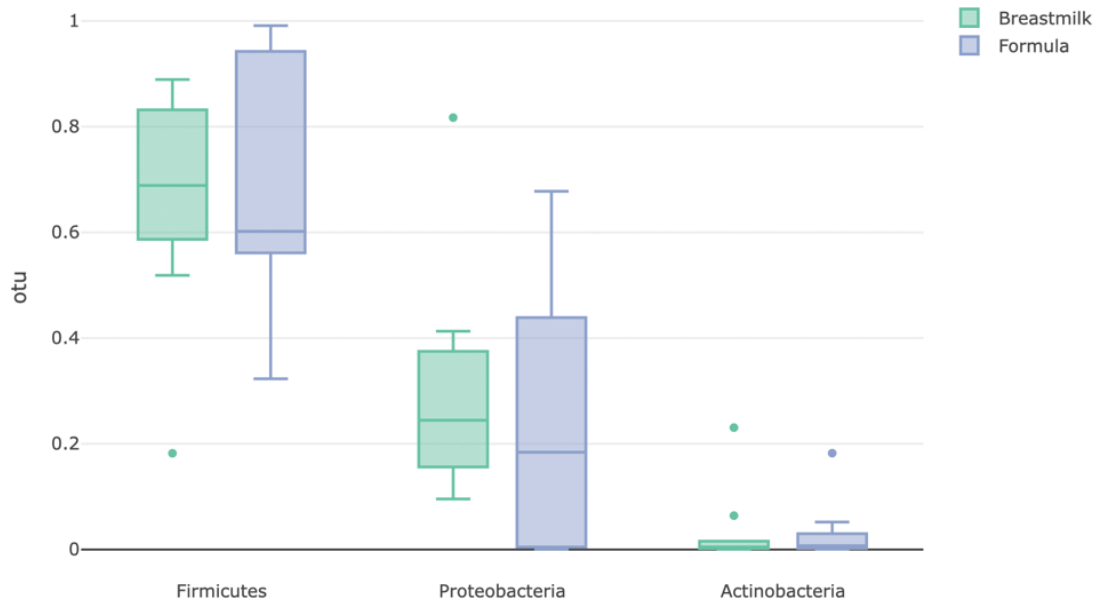

**Supplementary Figure S1. Boxplot of the top three most abundant bacterial phyla in breast milk and formula fed preterm infants.**

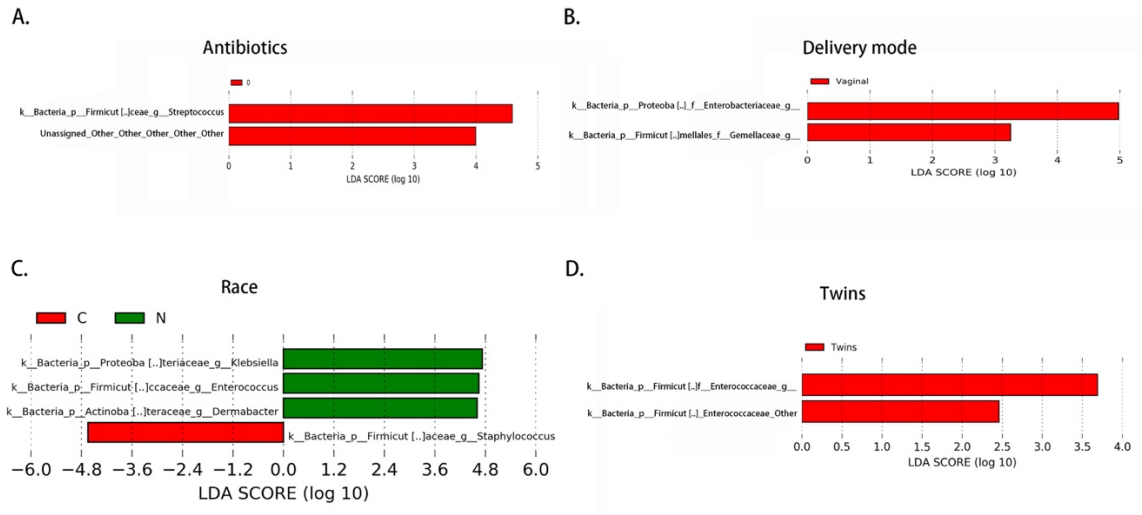

**Supplementary Figure S2. Bar chart of the relative abundance differences between different factors.** (A) Bar chart of the relative abundance differences between antibiotics and non-antibiotics (0). (B) Bar chart of the relative abundance differences between vaginal delivery and Caesarean section. (C) Bar chart of the relative abundance differences between Caucasian (C) and Native American (N). (D) Bar chart of the relative abundance differences between twins and non-twins.

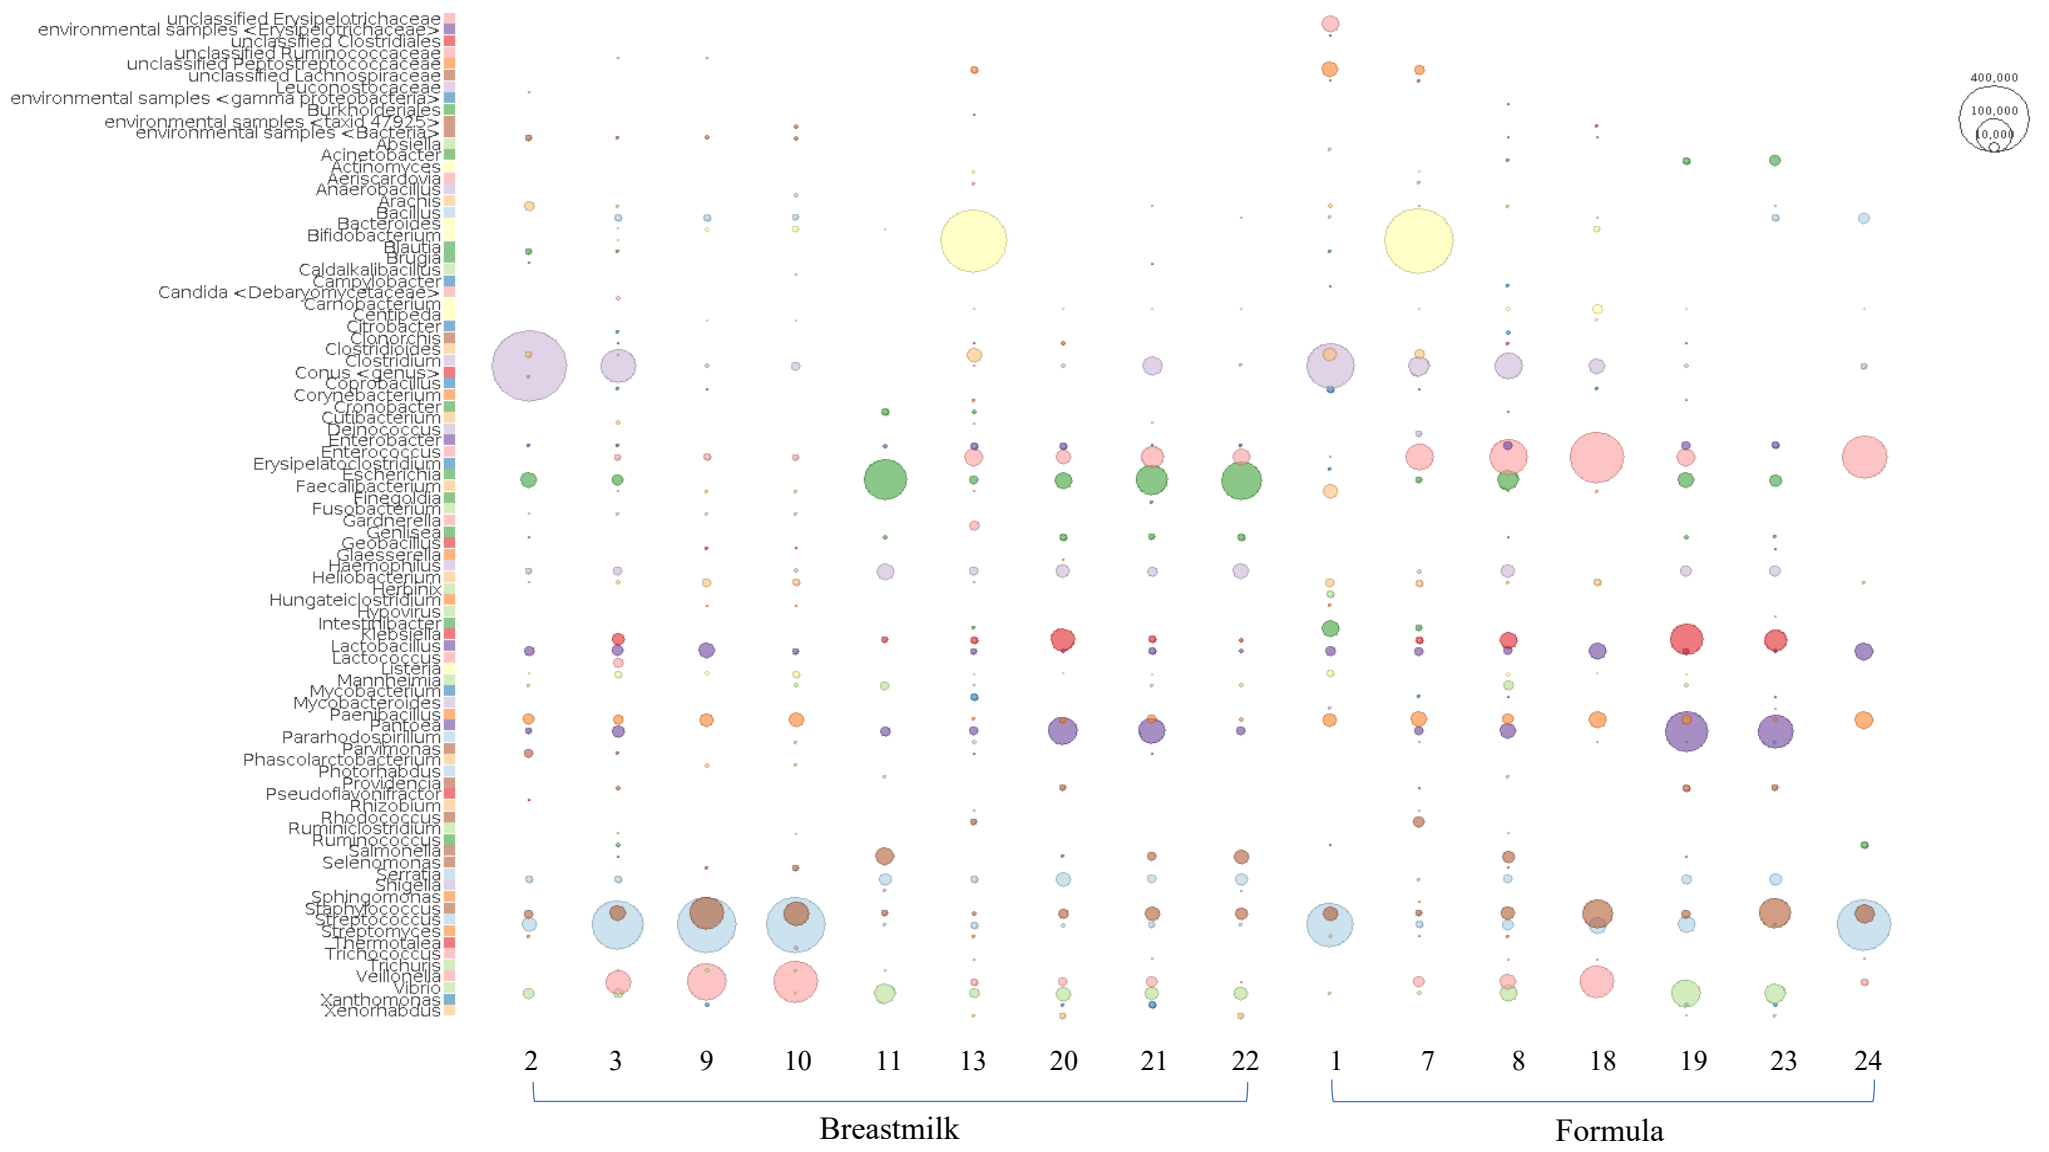

**Supplementary Figure S3. Bubble charts of sixteen infants metatranscriptomic results at genus level**



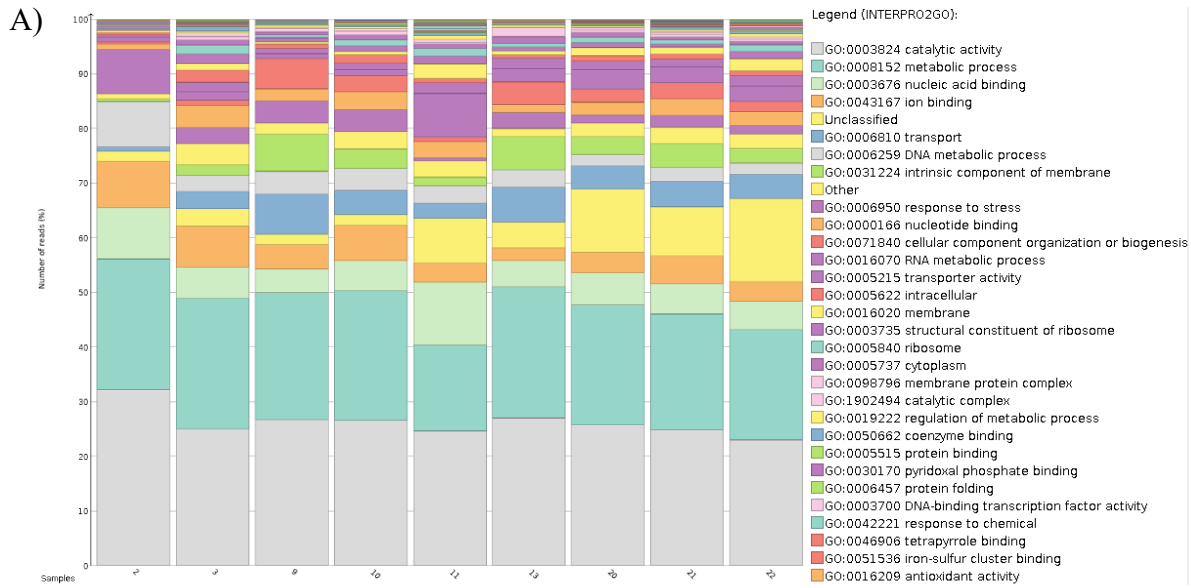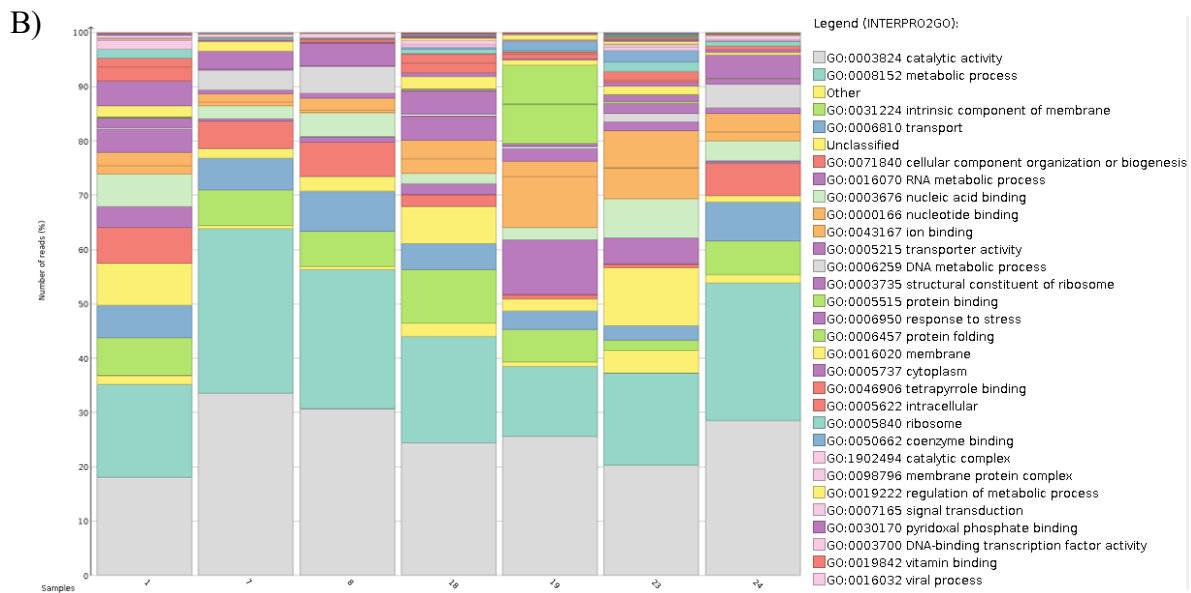

**Supplementary Figure S4. Functional analysis (InterPro2GO) of sixteen infants. (A) Bar chart of InterPro2GO in MBM infants. (B) Bar chart of InterPro2GO in formula-fed infants (Partial legend was showed, see Supplementary Table 5 for complete list).**

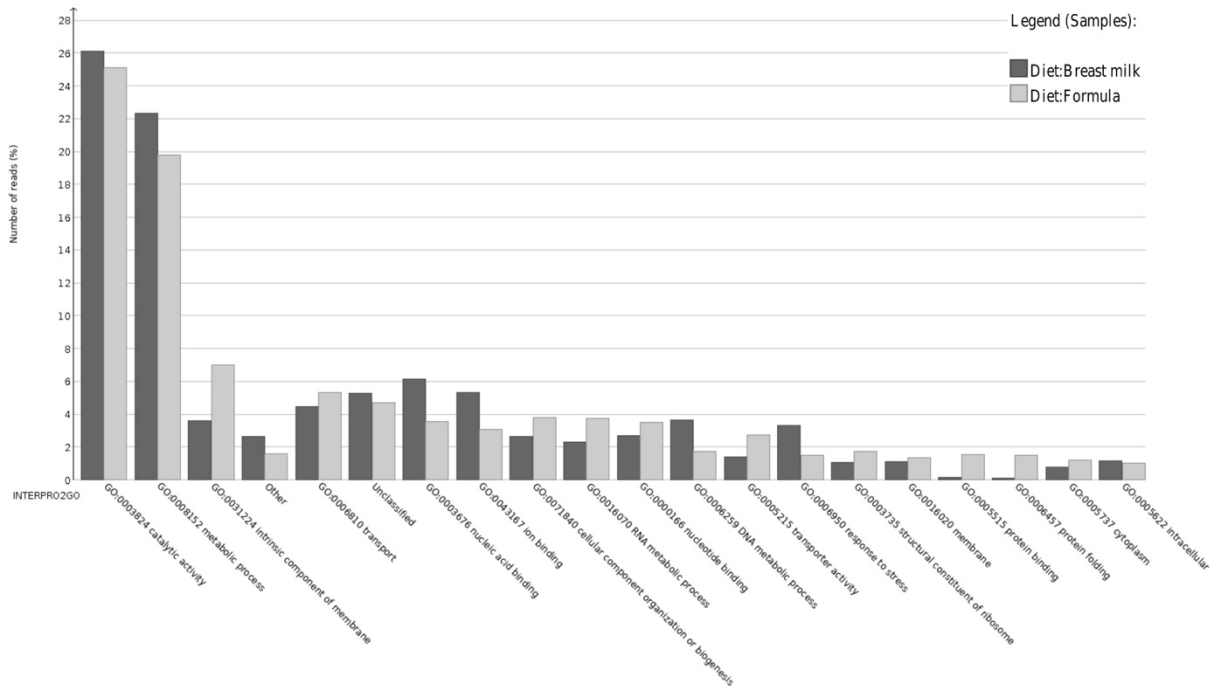

**Supplementary Figure S5. Number of reads of Gene Ontology Categories compared between two diet groups.** The summary of Interpro2GO results from nine MBM infants and seven formula fed infants. Partial categories are shown, listed by decrease order. Bar charts of gene ontology shown infants individually and the complete list of Gene Ontology Categories are in Supplemental Table 5.

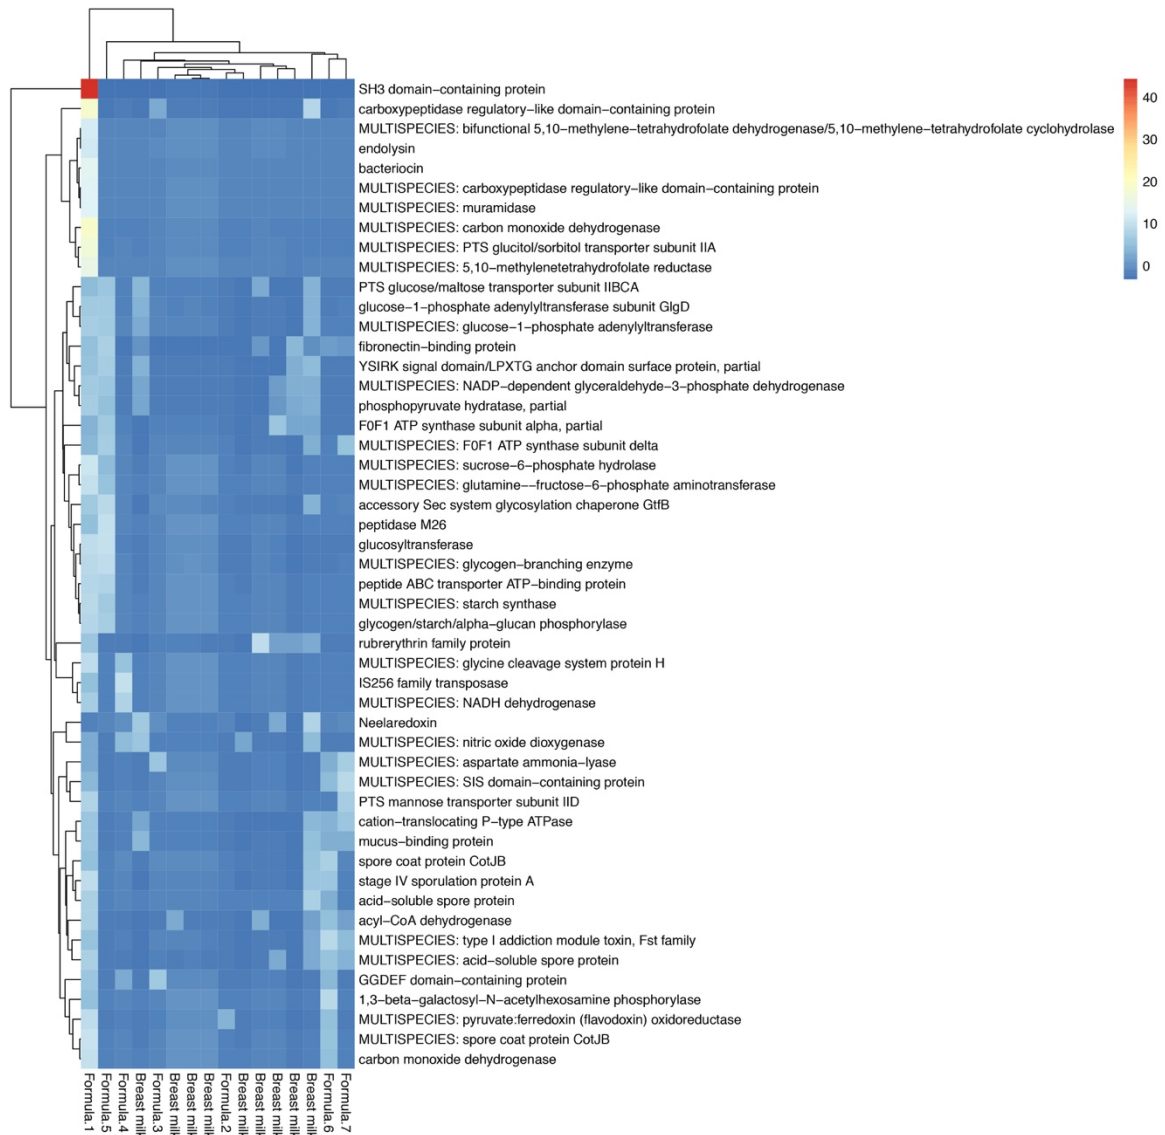

Supplementary Figure S6. Heatmap of function analysis against RefSeq database of sixteen infants.
